# Supplementary material
Source: PubMed Central journal article supplement (PMC3529593)
Supplement: supp_djs299_jnci_JNCI_12_0347_s01.pdf [file supp_djs299_jnci_JNCI_12_0347_s01.pdf]

**Supplementary Table 1.** ICD codes defining causes of death among men diagnosed with prostate cancer in the Swedish registries\*

| <b>Cause of death category</b>                | <b>ICD-7</b>                  | <b>ICD-8</b>           | <b>ICD-9</b>           | <b>ICD-10</b>       |
|-----------------------------------------------|-------------------------------|------------------------|------------------------|---------------------|
| Prostate cancer                               | 177                           | 185                    | 185                    | C61                 |
| Other cancers                                 | 140–209                       | 140–209                | 140–208                | C00–C99             |
| Ischemic heart disease                        | 420                           | 410–414                | 410–414                | I20–I25             |
| Cerebrovascular disease                       | 330–334                       | 430–434,<br>436–438    | 430–434,<br>436–438    | I60–I69             |
| COPD                                          | 501, 502,<br>526, 527,<br>241 | 490–493,<br>518        | 490–494,<br>496        | J40–J44             |
| Diabetes                                      | 260                           | 250                    | 250                    | E10–E14             |
| External cause of death,<br>including suicide | E800–999,<br>E971–E979        | E800–999,<br>E950–E959 | E800–999,<br>E950–E959 | V01–Y98,<br>X60–X84 |
| Other specified causes†                       | 001–795                       | 000–796                | 001–799                | A00–R99             |

\*ICD = International Classification of Diseases; COPD = chronic obstructive pulmonary disease.

†The ICD codes included in the category for “other specified causes” of death in this table include the above range of codes as reported in the Swedish registry. ICD codes previously listed in other cause of death categories above were not included in the “other specified causes” category.

**Supplementary Table 2.** ICD codes defining causes of death among men diagnosed with prostate cancer in the SEER Registry\*

| <b>Cause of death category</b>             | <b>ICD-8</b>               | <b>ICD-9</b>               | <b>ICD-10</b>                                  |
|--------------------------------------------|----------------------------|----------------------------|------------------------------------------------|
| Prostate cancer†                           | 185                        | 185                        | C61                                            |
| Other cancers†                             | 140–184.9, 186–203.8       | 140–184.9, 186–203.8       | C00–C58, C62–C97                               |
| Ischemic heart disease                     | 390–398, 402, 404, 410–429 | 390–398, 402, 404, 410–429 | I00–I09, I11, I13, I20–I51                     |
| Cerebrovascular disease                    | 430–438                    | 430–438                    | I60–I69                                        |
| COPD                                       | 490–493, 519.3             | 490–496                    | J40–J47                                        |
| Diabetes                                   | 250                        | 250                        | E10–E14                                        |
| External cause of death, including suicide | 800–978, 950–959           | 800–999, 950–E959          | V01–Y09, Y35, Y85–Y89, U01–U03, X60–X84, Y87.0 |
| Other specified causes‡                    | 001–796                    | 001–799                    | A00–R99                                        |

\*ICD = International Classification of Diseases; COPD = chronic obstructive pulmonary disease.

†Individual ICD-8 codes for malignancies were converted to ICD-9 codes

‡The ICD codes included in the category for “other specified causes” of death in this table include the above range of codes as reported in the SEER program. ICD codes previously listed in other cause of death categories above were not included in the “other specified causes” category.
