# Supplementary material
Source: PubMed Central journal article supplement (PMC3529593)
Supplement: supp_djs299_jnci_JNCI_12_0347_s02.pdf [file supp_djs299_jnci_JNCI_12_0347_s02.pdf]

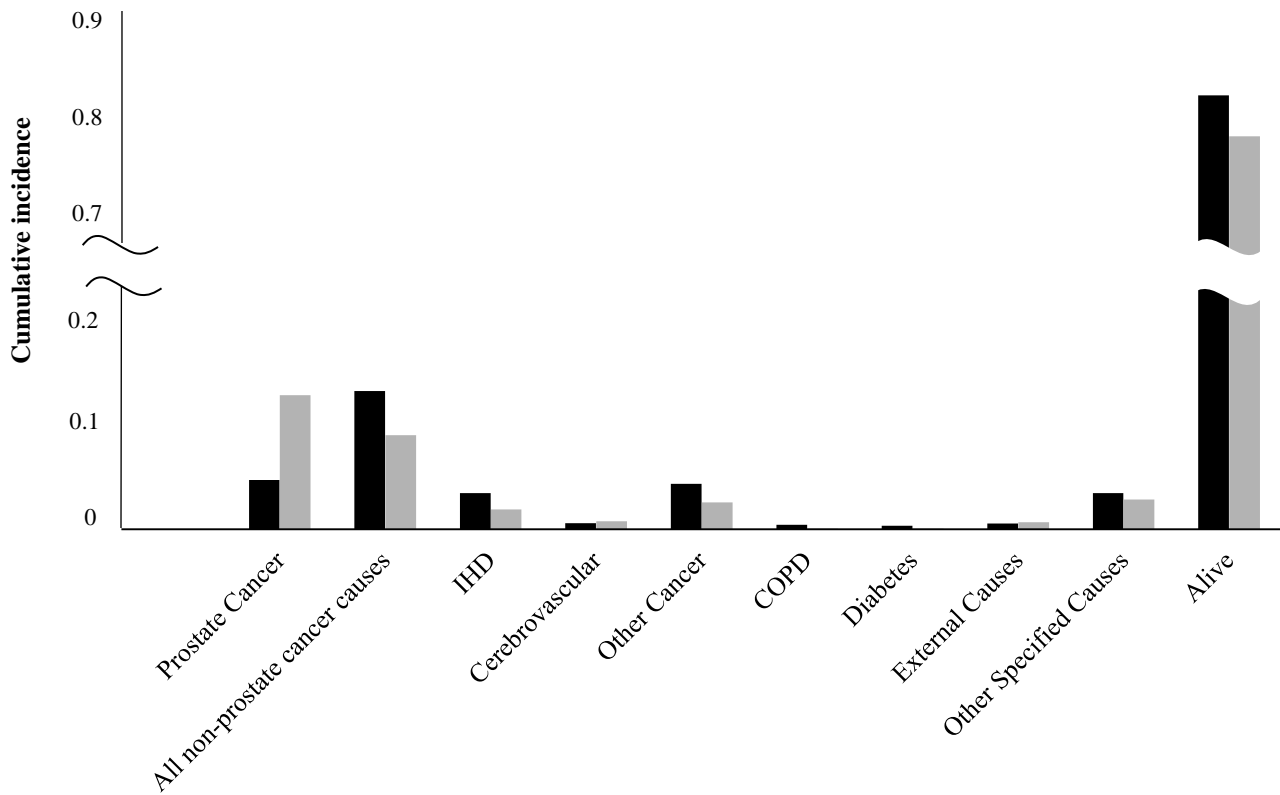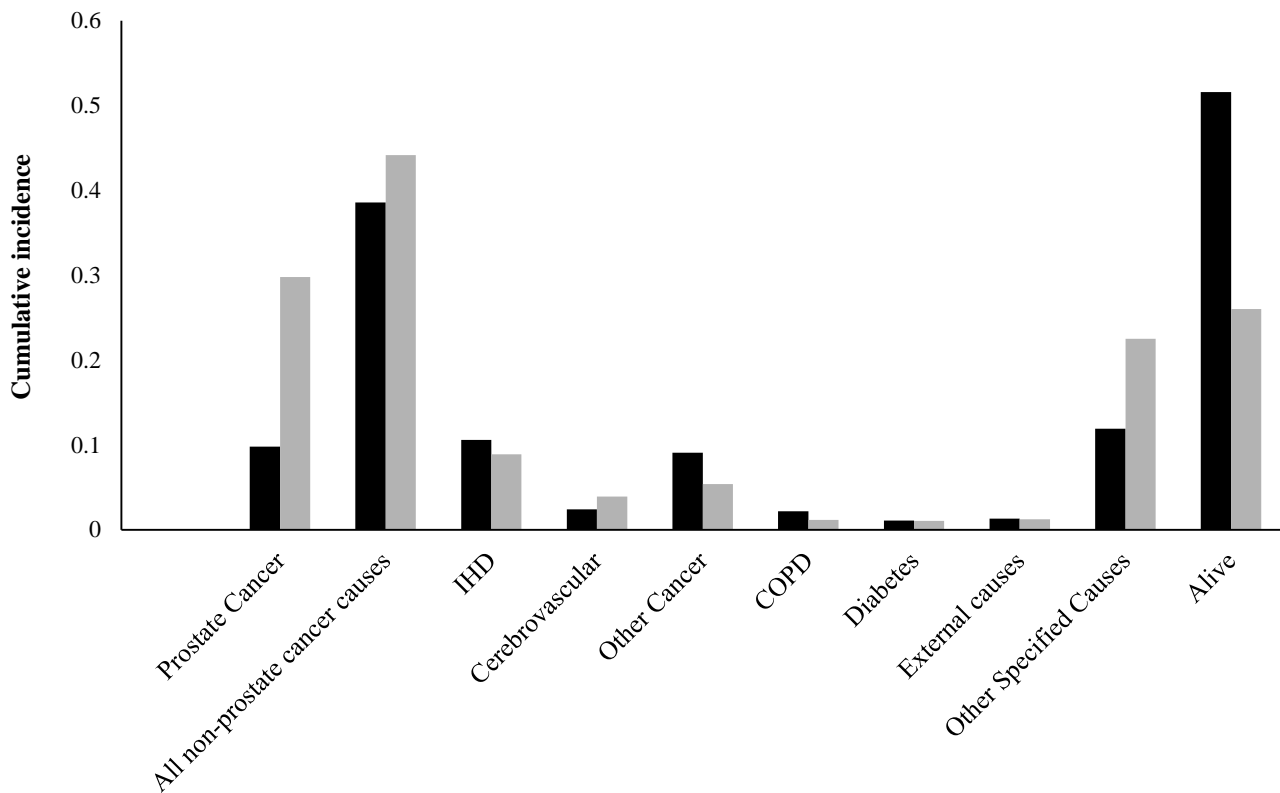

**Supplementary Figure 1.** Cumulative incidence of causes of death among men diagnosed with prostate cancer between 2000 and 2008. **Top:** men aged 60–64 years at diagnosis. **Bottom:** men aged 75–79 years at diagnosis. IHD = ischemic heart disease; COPD = chronic obstructive pulmonary disease; Other Specified Causes include those identified non-prostate cancer causes of death not included in other categories. **Black bars** = United States; **gray bars** = Sweden.
